# Supplementary material for: Learning developmental mode dynamics from single-cell trajectories
Source: eLife journal article supplement (doi:10.7554/elife.68679), 2021-12-29
Supplement: supp [file elife-68679-supp-v1.zip]

Archive with 11 entries (11 files):
- elife_poa_e68679_Figure_1_figure_supplement_1.pdf
- elife_poa_e68679_Figure_2_figure_supplement_1.pdf
- elife_poa_e68679_Figure_2_figure_supplement_2.pdf
- elife_poa_e68679_Figure_2_Figure_supplement_3.pdf
- elife_poa_e68679_Figure_2_Figure_supplement_4.pdf
- elife_poa_e68679_Figure_4_figure_supplement_1.pdf
- elife_poa_e68679_Video_1.mp4
- elife_poa_e68679_Video_2.mp4
- elife_poa_e68679_Video_3.mp4
- elife_poa_e68679_Video_4.mp4
- elife_poa_e68679_Transparent_Reporting_File.pdf
