# Supplementary figures and images for: Learning developmental mode dynamics from single-cell trajectories
Source: eLife journal article supplement (doi:10.7554/elife.68679), 2021-12-29

Max  $l$  for learning

●  $\rho$  ●  $j^{(1)}$  ●  $j^{(2)}$

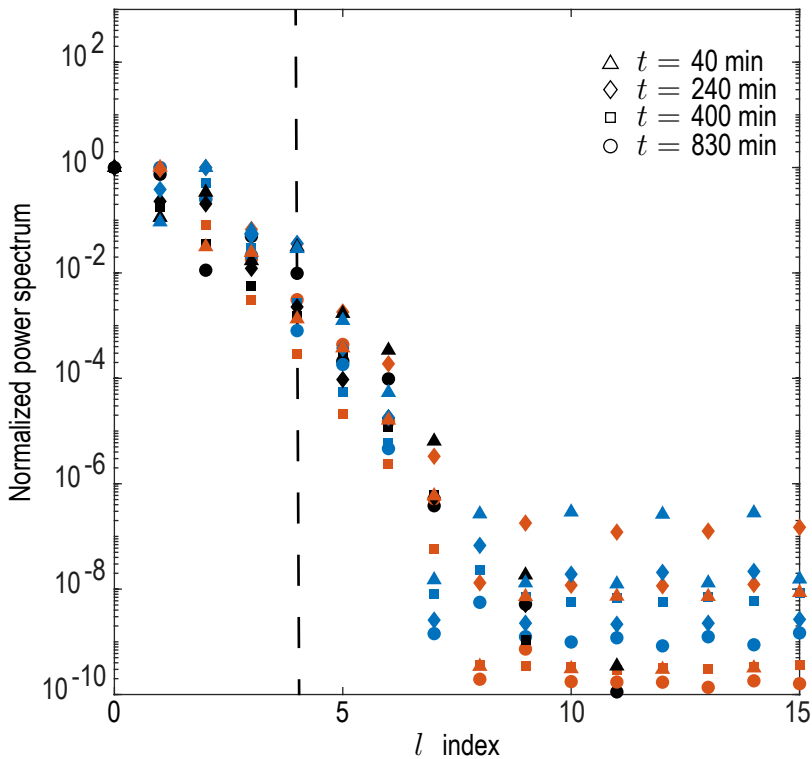

Supplement: supp [file elife-68679-supp-v1.zip › elife_poa_e68679_Figure_1_figure_supplement_1.pdf]

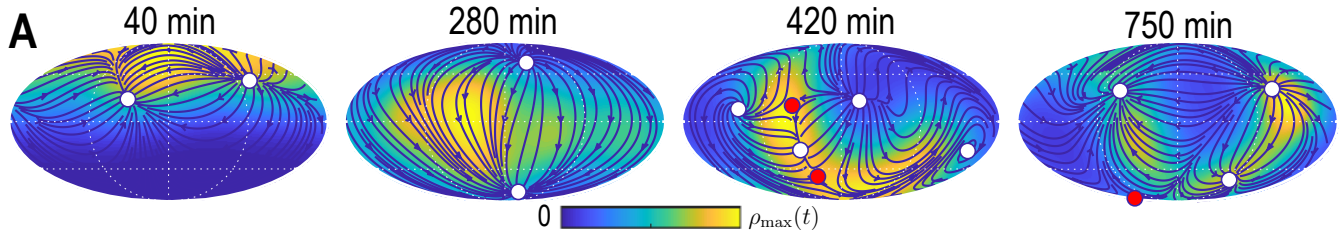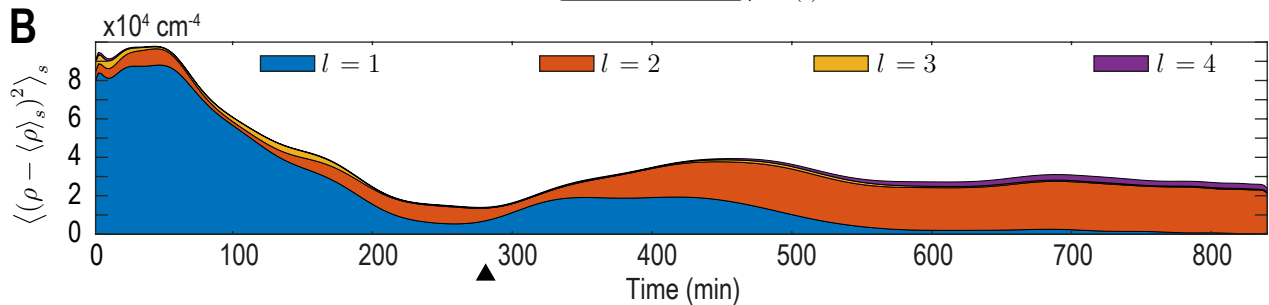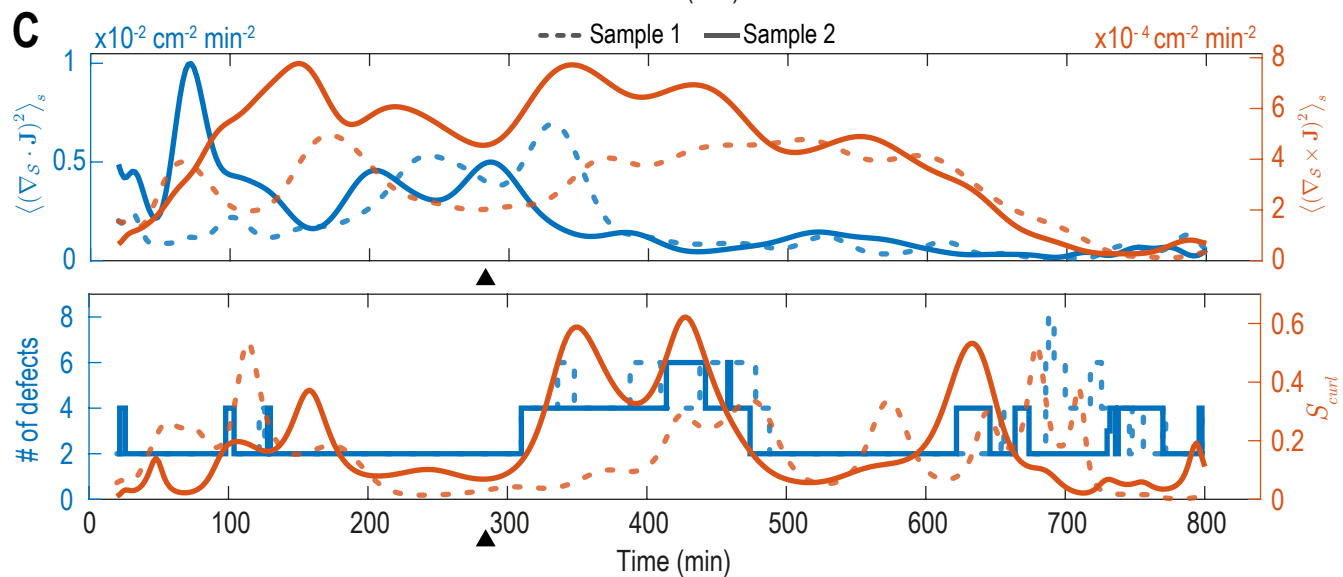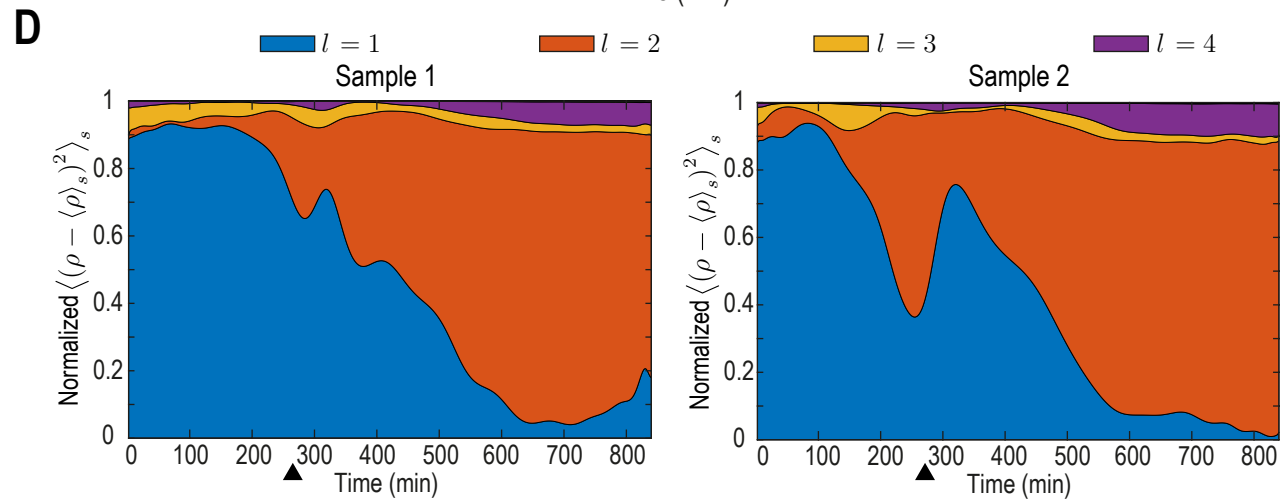

Supplement: supp [file elife-68679-supp-v1.zip › elife_poa_e68679_Figure_2_figure_supplement_1.pdf]

**A**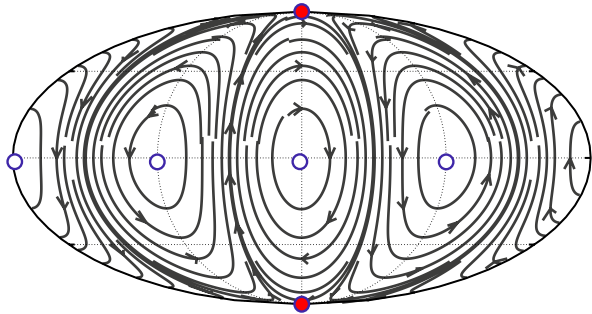**B**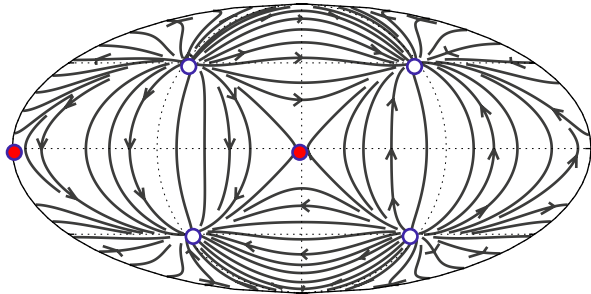

Supplement: supp [file elife-68679-supp-v1.zip › elife_poa_e68679_Figure_2_figure_supplement_2.pdf]

Sample 1

 $k = 5$ 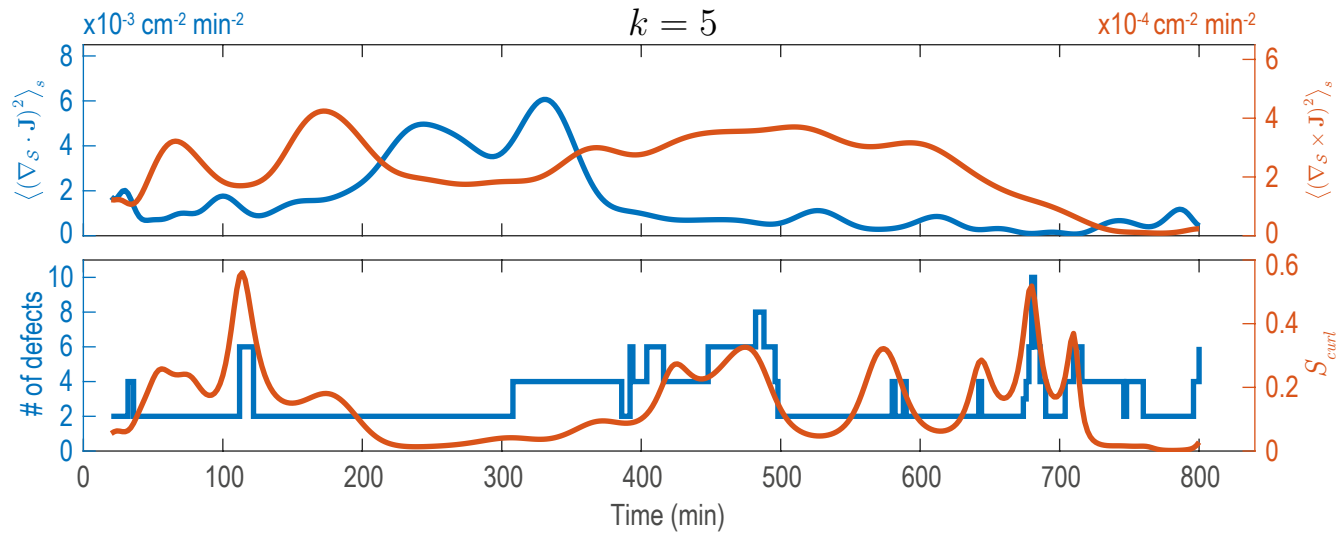 $k = 7$ 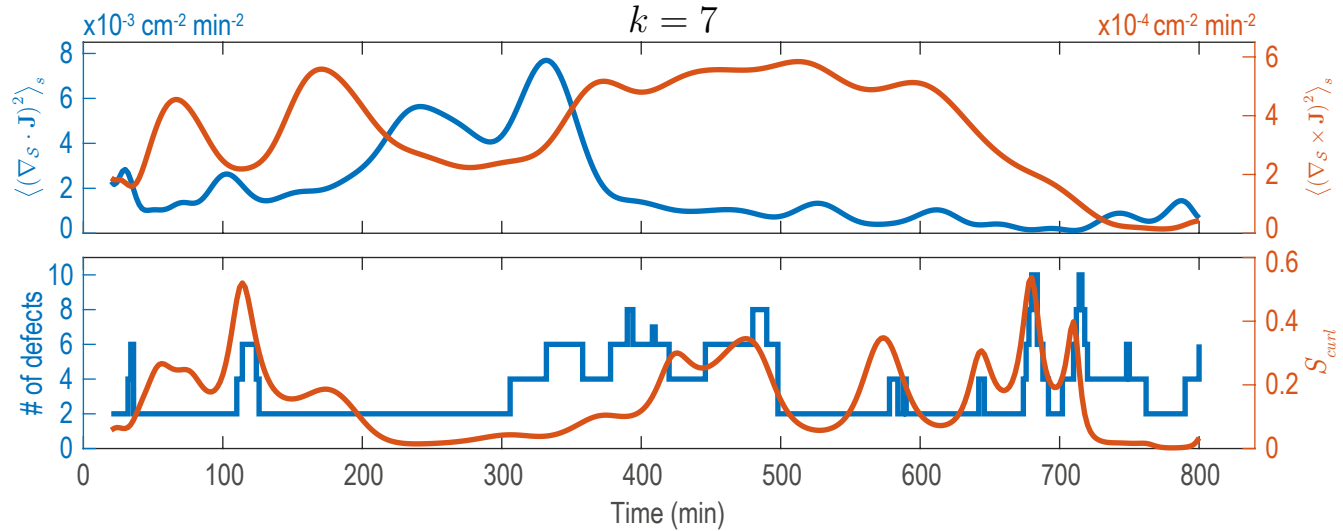

Supplement: supp [file elife-68679-supp-v1.zip › elife_poa_e68679_Figure_2_Figure_supplement_3.pdf]

Sample 2

$k = 5$

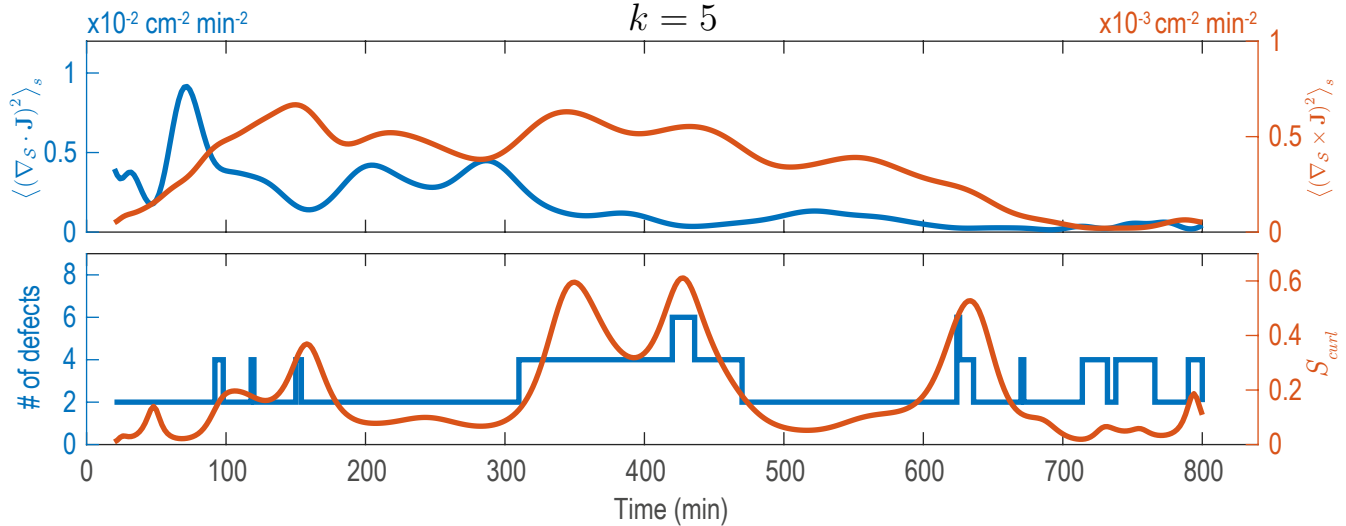

$k = 7$

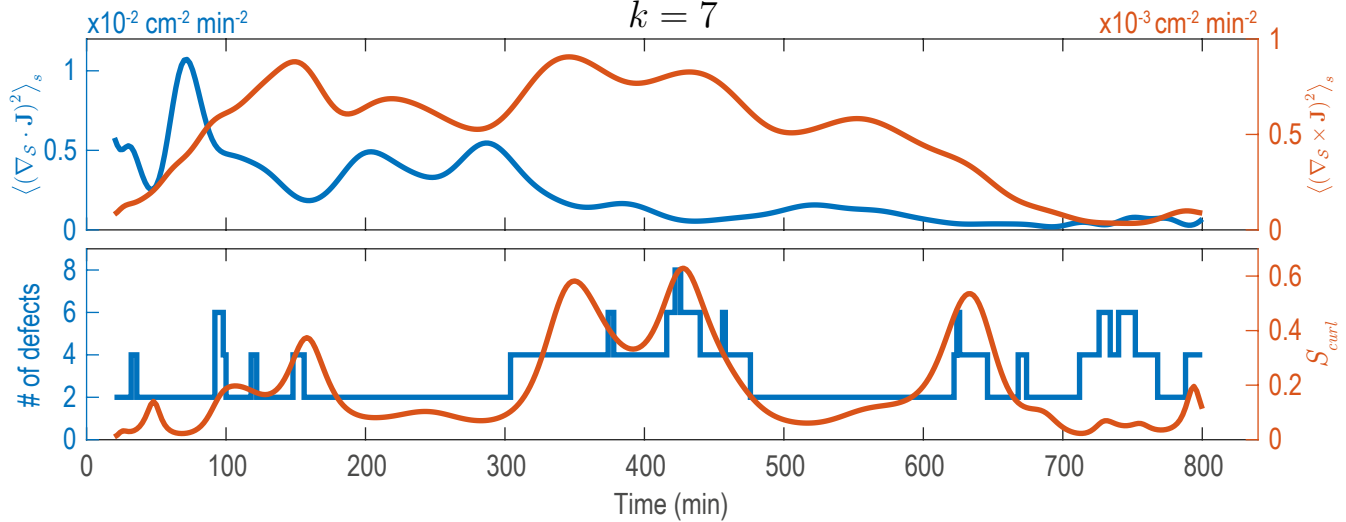

Supplement: supp [file elife-68679-supp-v1.zip › elife_poa_e68679_Figure_2_Figure_supplement_4.pdf]

### Additional experimental sample 2

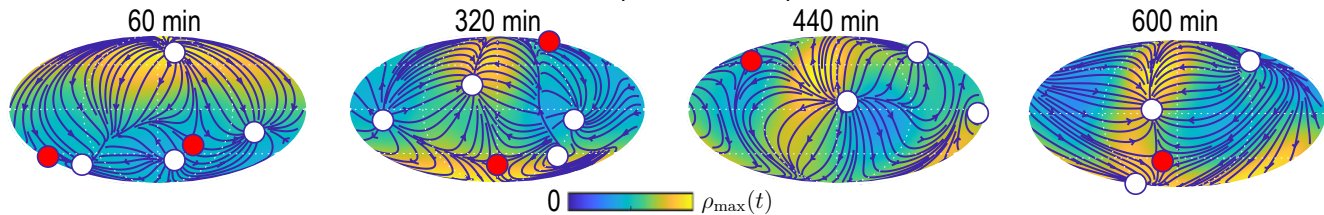

### Rotated sample 1

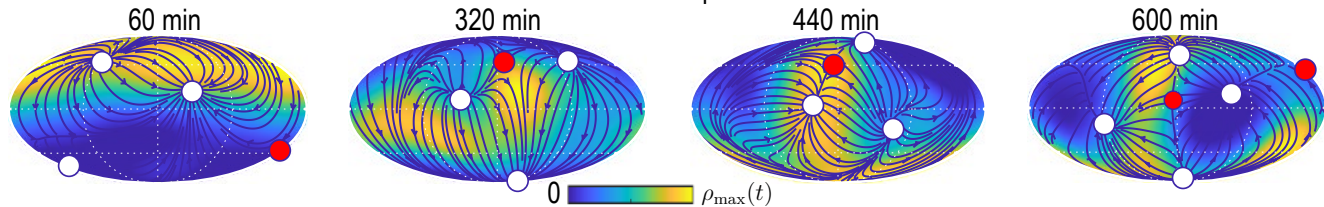

### Sample 1 with locally depleted density

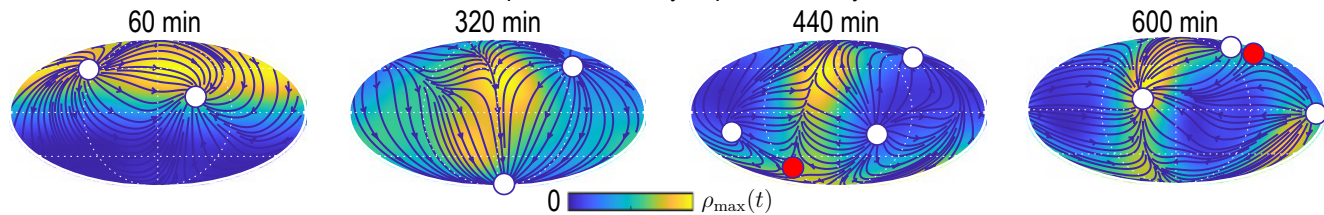

Supplement: supp [file elife-68679-supp-v1.zip › elife_poa_e68679_Figure_4_figure_supplement_1.pdf]
